# Supplementary material for: Statistical power and utility of meta-analysis methods for cross-phenotype genome-wide association studies
Source: PubMed Central journal article supplement (PMC5832233; doi:10.1371/journal.pone.0193256), 2018-03-01

Figure S1. Distributions of Effect Sizes

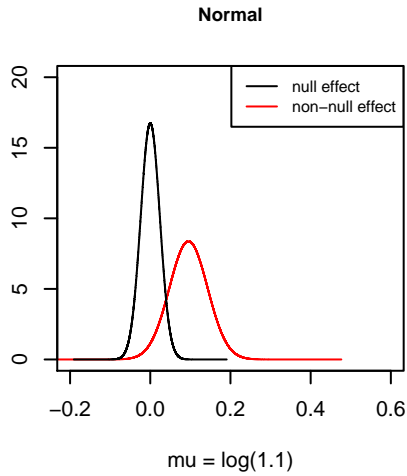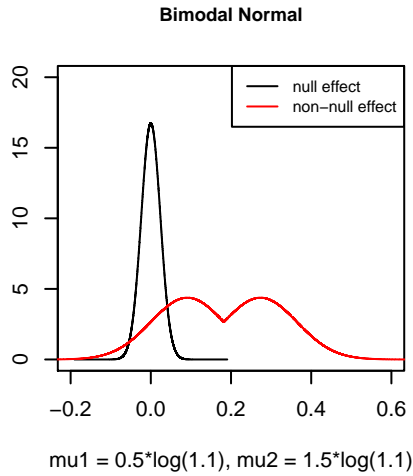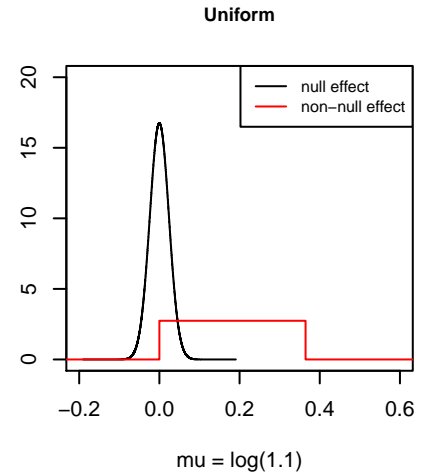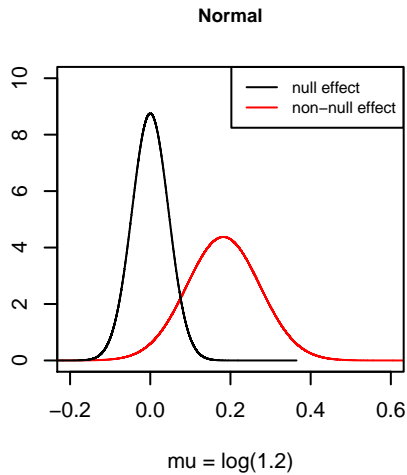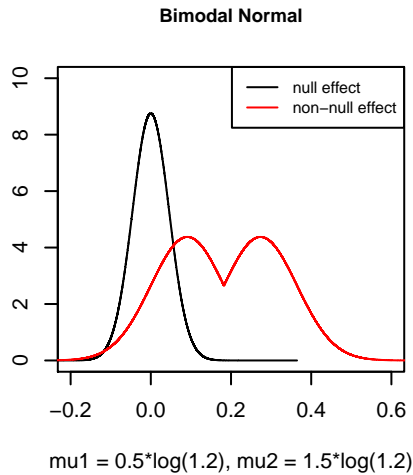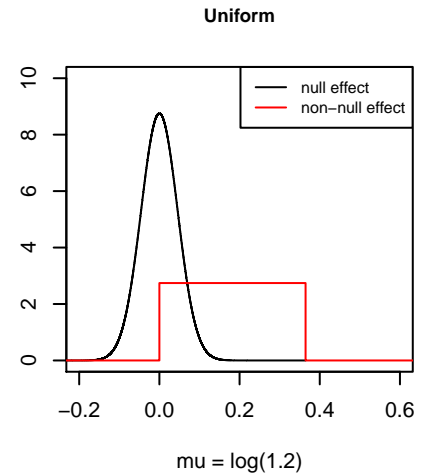

Supplement: pone.0193256.s001.pdf [file pone.0193256.s001.pdf]
