# Supplementary material for: Statistical power and utility of meta-analysis methods for cross-phenotype genome-wide association studies
Source: PubMed Central journal article supplement (PMC5832233; doi:10.1371/journal.pone.0193256), 2018-03-01

Figure S6 Power (Alpha=0.05 K=10, OR=1.1 25% Effects Opposite Direction)

**(A) Normal Distribution**

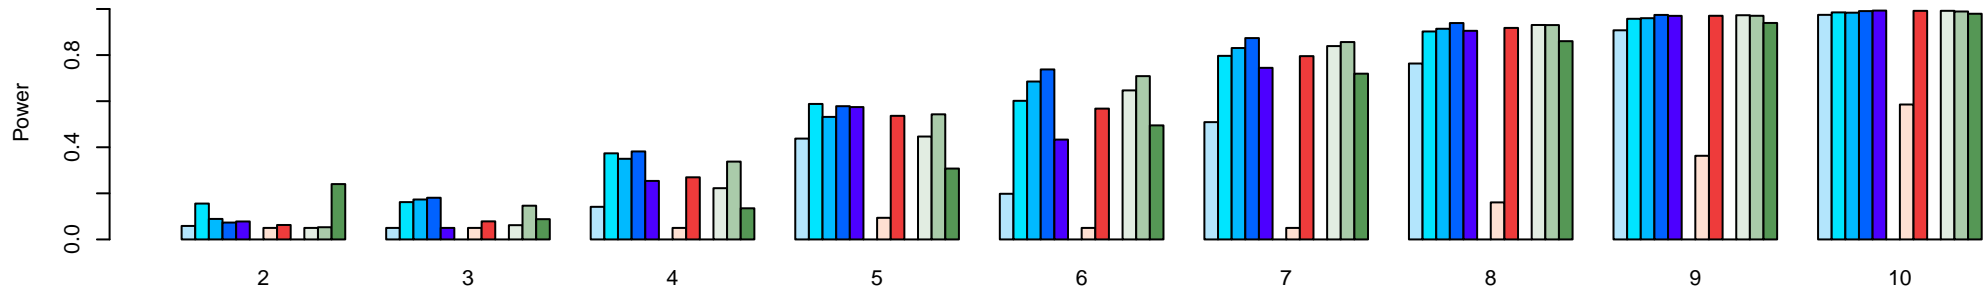

**(B) Bimodal Normal Distribution**

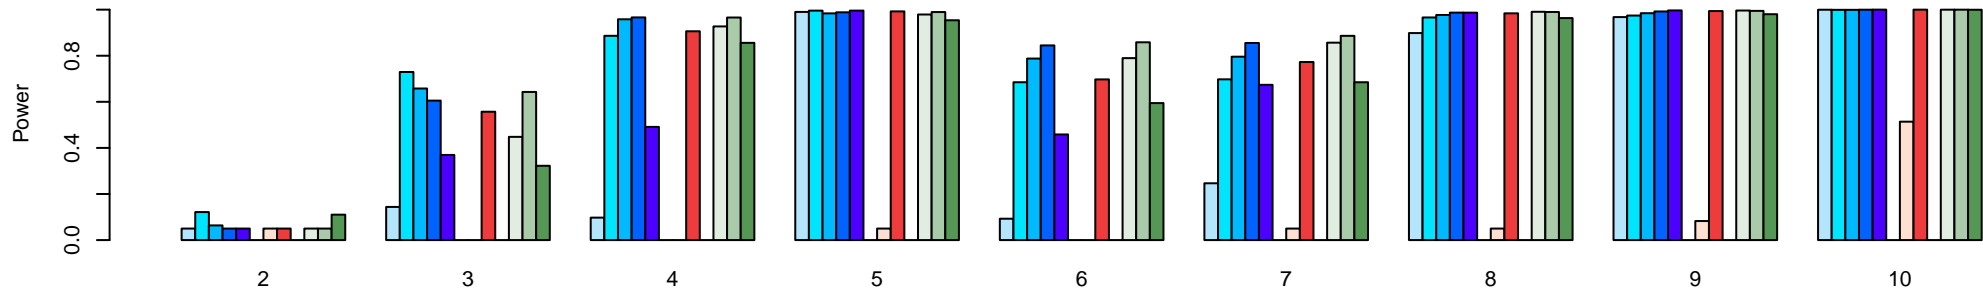

- █ FEMA
- █ ASSET1
- █ ASSET2
- █ CPASSOC
- █ BE
- █ REMA
- █ HE-REMA
- █ Fisher
- █ WICS
- █ CPMA

**(C) Uniform Distribution**

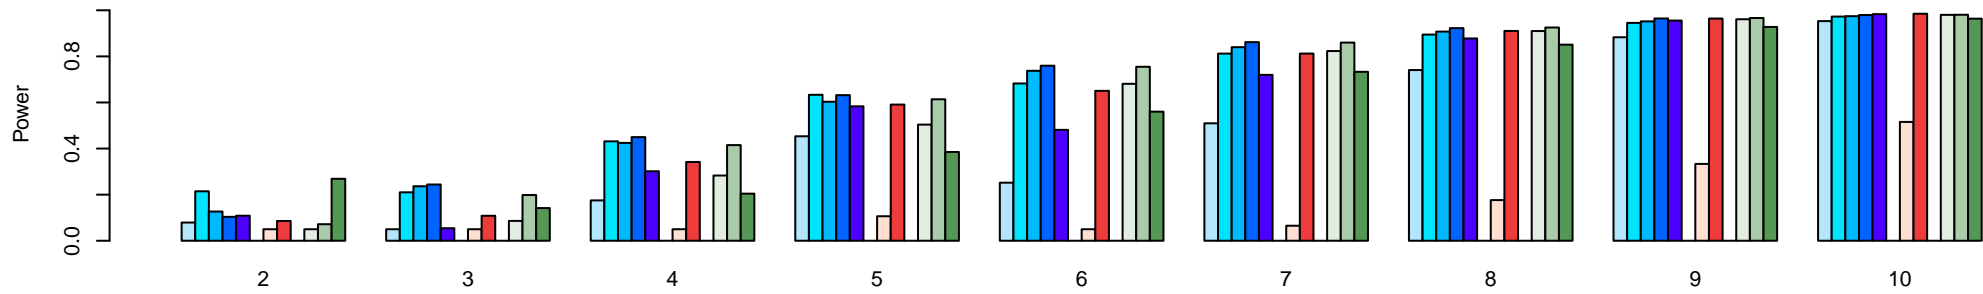

Supplement: pone.0193256.s006.pdf [file pone.0193256.s006.pdf]
