# Supplementary material for: Statistical power and utility of meta-analysis methods for cross-phenotype genome-wide association studies
Source: PubMed Central journal article supplement (PMC5832233; doi:10.1371/journal.pone.0193256), 2018-03-01

Figure S7 Power (Alpha=0.05 K=10, OR=1.1 50% Effects Opposite Direction)

(A) Normal Distribution

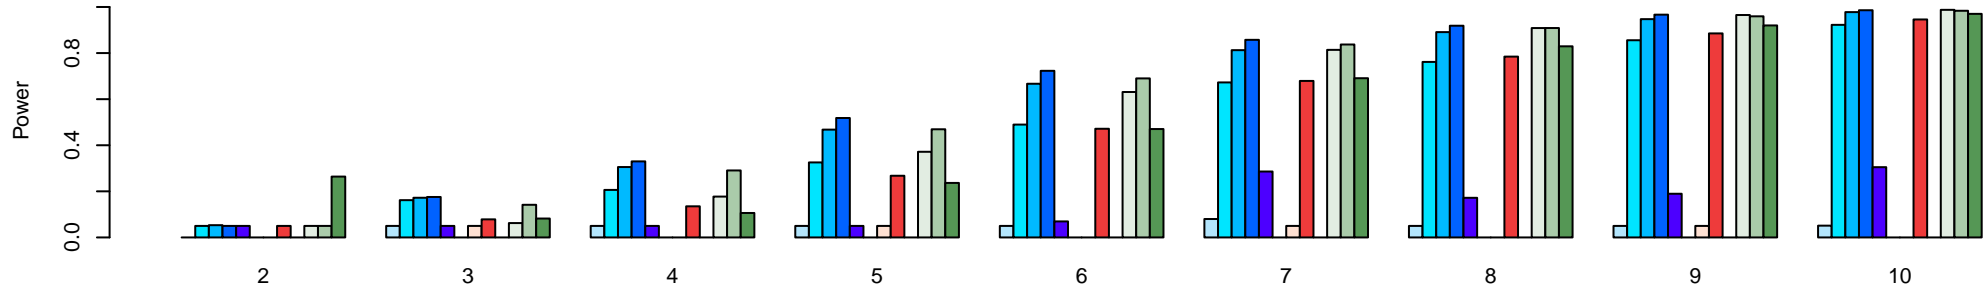

(B) Bimodal Normal Distribution

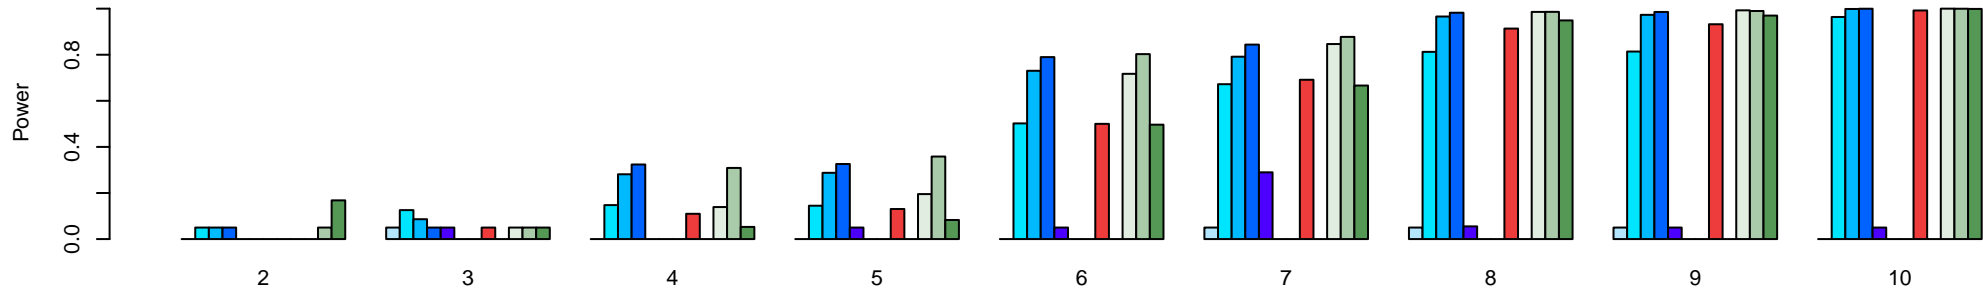

- █ FEMA
- █ ASSET1
- █ ASSET2
- █ CPASSOC
- █ BE
- █ REMA
- █ HE-REMA
- █ Fisher
- █ WICS
- █ CPMA

(C) Uniform Distribution

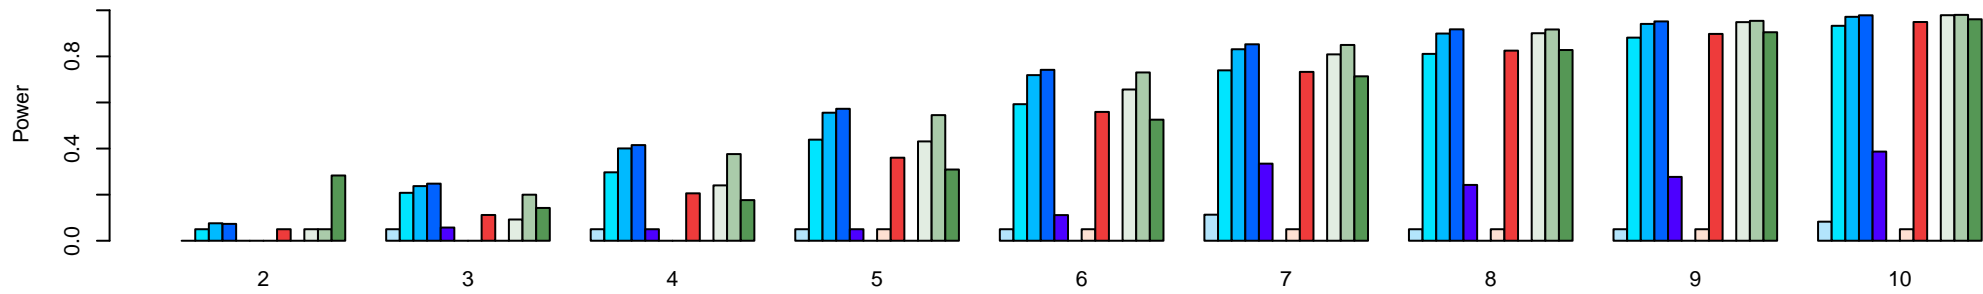

Supplement: pone.0193256.s007.pdf [file pone.0193256.s007.pdf]
