# Supplementary material for: Statistical power and utility of meta-analysis methods for cross-phenotype genome-wide association studies
Source: PubMed Central journal article supplement (PMC5832233; doi:10.1371/journal.pone.0193256), 2018-03-01

Figure S10 Power (Alpha=0.001 K=5, OR=1.2 50% Effects Opposite Direction)

**(A) Normal Distribution**

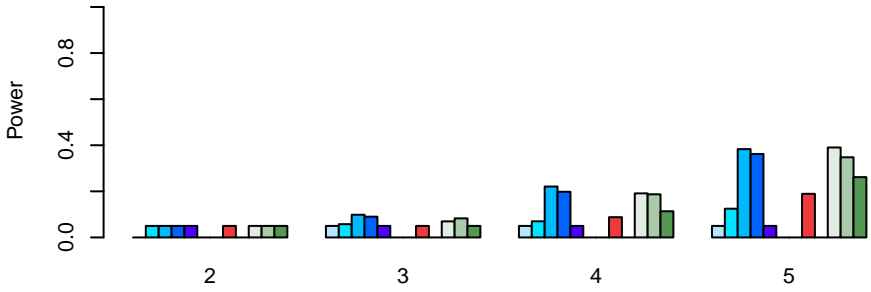

**(B) Bimodal Normal Distribution**

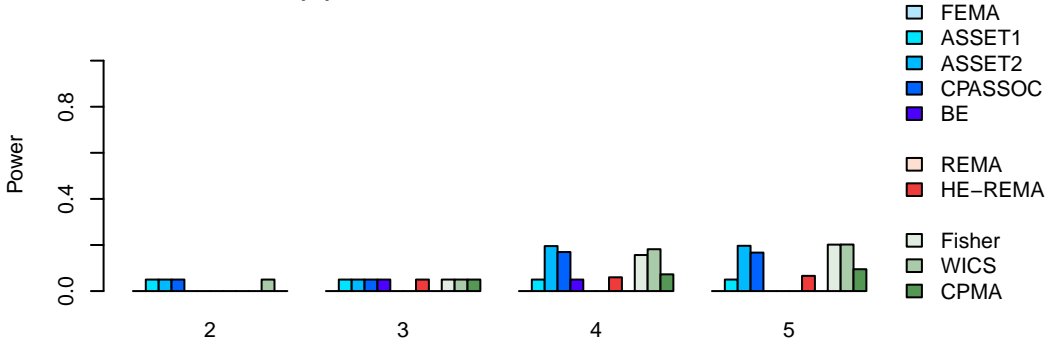

**(C) Uniform Distribution**

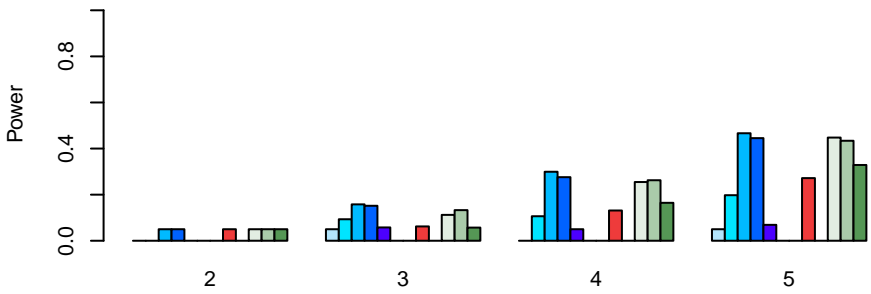

Supplement: pone.0193256.s010.pdf [file pone.0193256.s010.pdf]
