# Supplementary material for: Statistical power and utility of meta-analysis methods for cross-phenotype genome-wide association studies
Source: PubMed Central journal article supplement (PMC5832233; doi:10.1371/journal.pone.0193256), 2018-03-01

Figure S11 Power (Alpha=0.001 K=10, OR=1.2 All Effects Same Direction)

**(A) Normal Distribution**

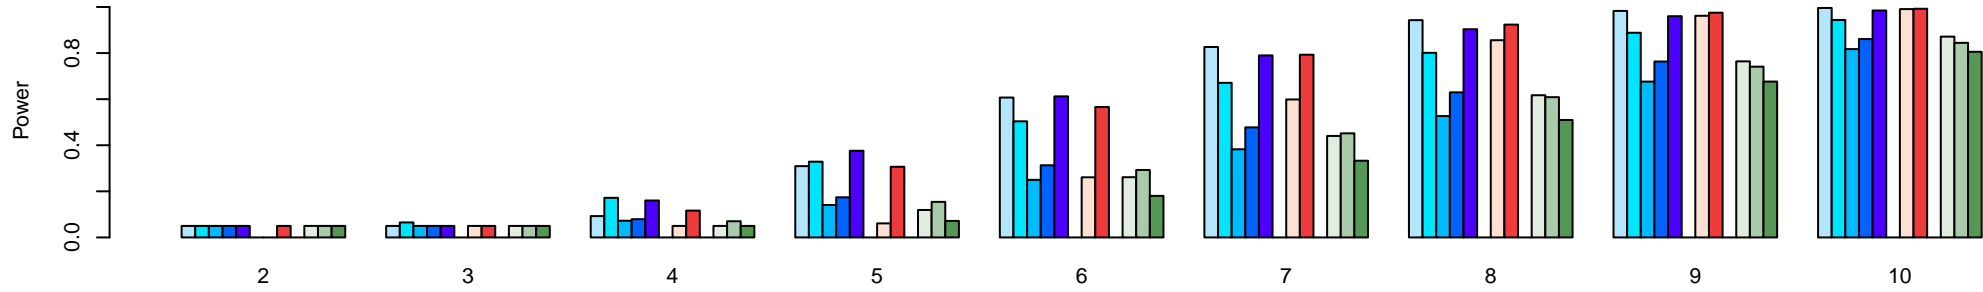

**(B) Bimodal Normal Distribution**

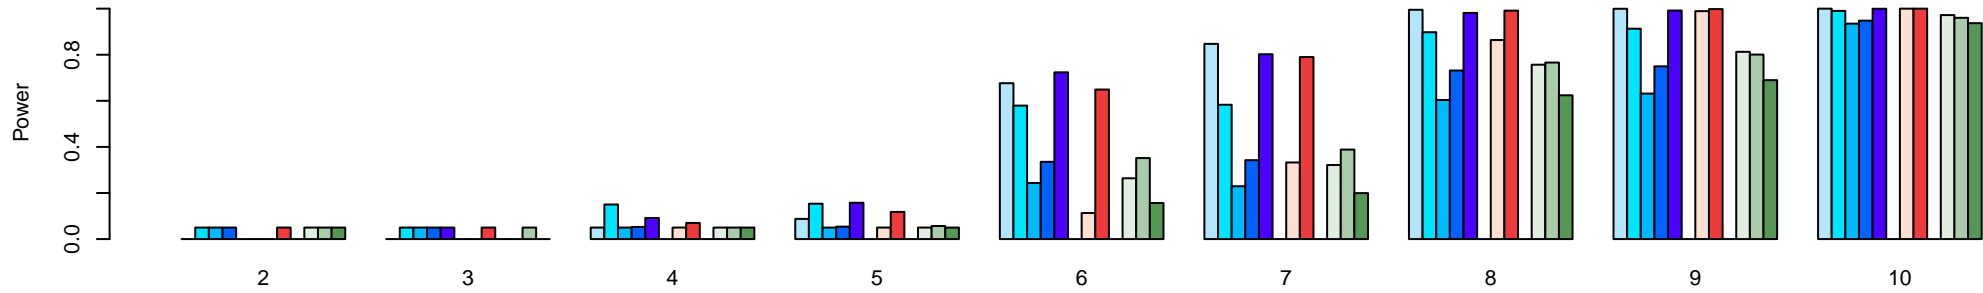

- FEMA
- ASSET1
- ASSET2
- CPASSOC
- BE
- REMA
- HE-REMA
- Fisher
- WICS
- CPMA

**(C) Uniform Distribution**

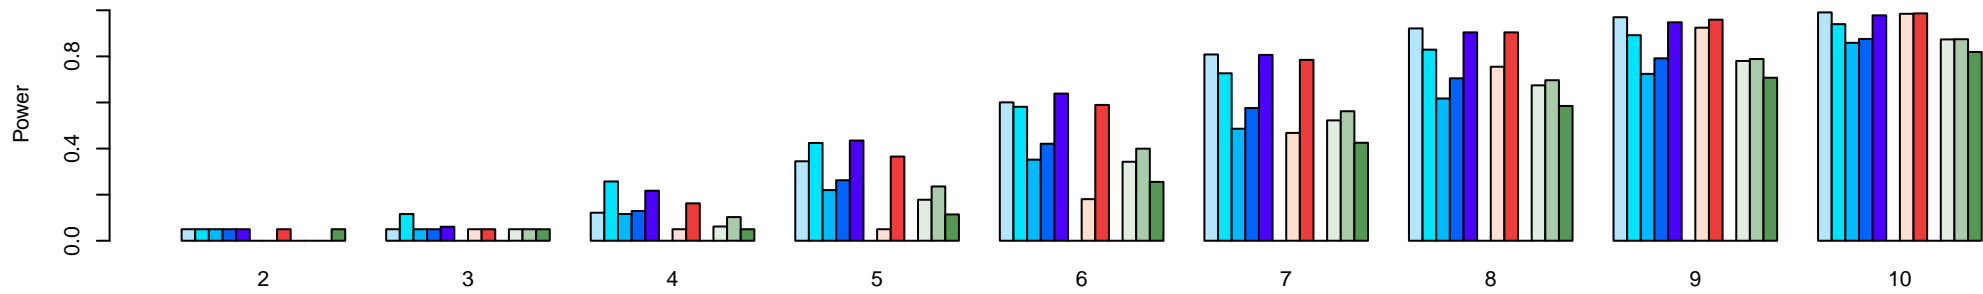

Supplement: pone.0193256.s011.pdf [file pone.0193256.s011.pdf]
