# Supplementary material for: Statistical power and utility of meta-analysis methods for cross-phenotype genome-wide association studies
Source: PubMed Central journal article supplement (PMC5832233; doi:10.1371/journal.pone.0193256), 2018-03-01

Figure S14. QQ Plots

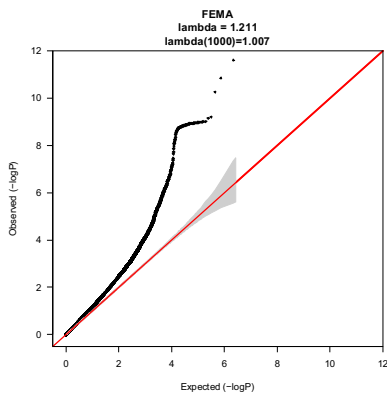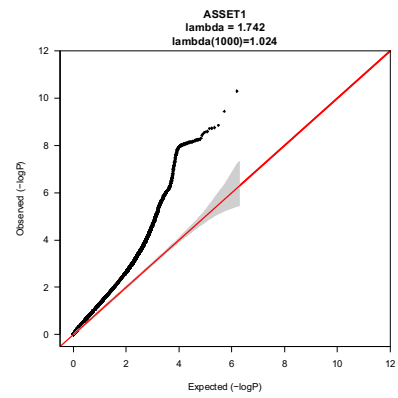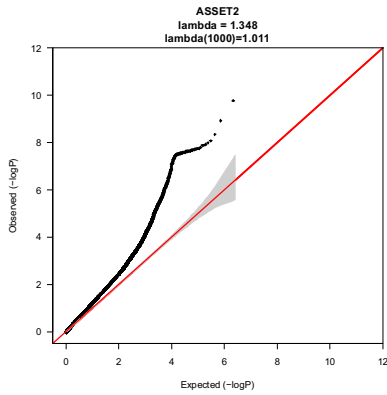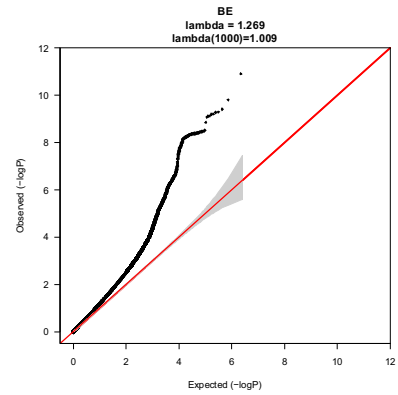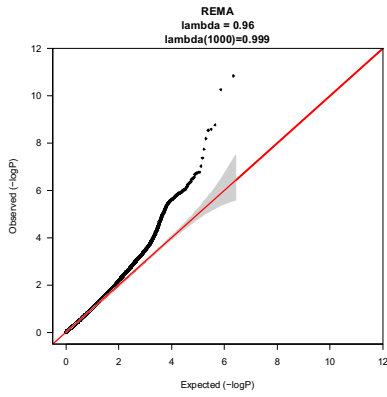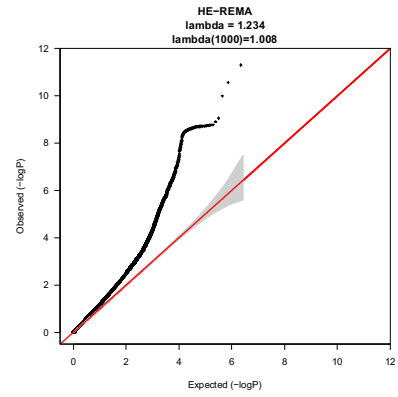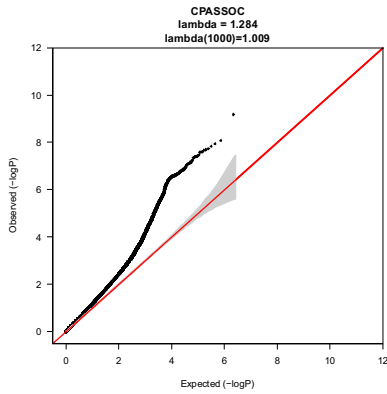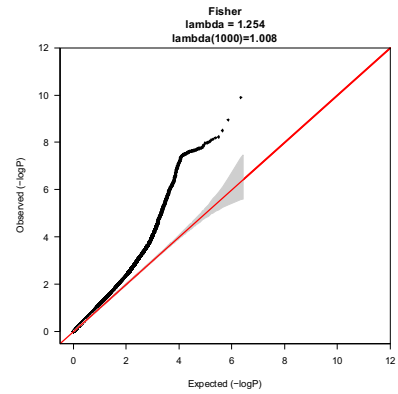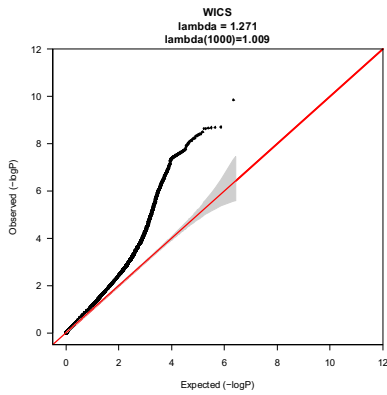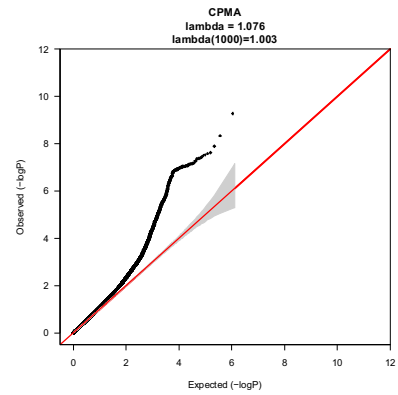

Supplement: pone.0193256.s014.pdf [file pone.0193256.s014.pdf]
