# Supplementary material for: Statistical power and utility of meta-analysis methods for cross-phenotype genome-wide association studies
Source: PubMed Central journal article supplement (PMC5832233; doi:10.1371/journal.pone.0193256), 2018-03-01
Supplement: pone.0193256.s016.pdf [file pone.0193256.s016.pdf]

## Supplementary Note S1. Summary of evaluated methods

Here we briefly describe distinct features of these methods. Let us first define some common notations. We consider a study of  $K$  phenotypes. For a variant in each study of a given phenotype  $k$  ( $1 \leq k \leq K$ ), we denote the effective number of study subjects, estimated effect size, and sampling variance as  $n_k$ ,  $X_k$ , and  $se_k^2$ , respectively. The Z-score of a variant for each study is calculated as  $Z_k = \frac{X_k}{se_k}$ .

**FEMA (Fixed-Effects Meta-analysis):** Fixed-effect meta-analysis assumes a homogeneous effect size of a genetic variant across study phenotypes. Here we use the inverse-variance weighted method[1] that calculates a mean of the effect sizes while weighing each study using the inverse of the variance. This method is approximately equivalent to the weighted sum-of-Z-score model (Z). The Z-score of FEMA is calculated as:

$$Z_{\text{FEMA}} = \frac{\sum_{k=1}^K (w_k X_k)}{\sqrt{\sum_{k=1}^K w_k}}$$

$$\text{where } w_k = \frac{1}{se_k^2}.$$

**ASSET1/ASSET2:** ASSET is a generalized fixed-effects meta-analysis package that examines all possible subsets of study traits for the detection of shared association signals.[2] To correct for multiple testing arising from the exhaustive sub-set-based search, ASSET employs the discrete local maxima (DLM) method that efficiently estimates tail probabilities of the examined Z-score test statistic. When  $T$  represents a

set of study traits selected from  $K$  studies, meta-analysis statistic of the one-sided test (ASSET1) is defined as:

$$Z_{ASSET1} = \max_{T \in \text{Powerset}(\{1,2,\dots,K\})} |Z(T)| = \max_{T \in \text{Powerset}(\{1,2,\dots,K\})} \left| \sum_{k \in T} \sqrt{\pi_k(T)} Z_k \right|$$

where  $\pi_k(T) = n_k / \sum_{k \in T} n_k$  represents the sample size of the study  $k$  relative to the total sample size of the given subset  $T$ . ASSET also provides the two-sided test, which we refer to as ASSET2, that allows detection of effects in opposite directions:

$$Z_{ASSET2} = Z_{max-meta}^{(2)} = -2[\log \tilde{P}_{DLM}^+ + \log \tilde{P}_{DLM}^-]$$

$$\tilde{P}_{DLM}^{(2)} = P(\chi_4^2 > Z_{max-meta}^{(2)})$$

where  $\tilde{P}_{DLM}^+$  and  $\tilde{P}_{DLM}^-$  are the conditional p values of the strongest association captured in the subsets of studies in positive and negative directions respectively.

**BE (Binary Effects Model):** The BE is another fixed-effects-based meta-analysis method that specifically targets the scenarios when only a subset of study traits show an effect.[3] For this purpose, the BE method first calculates a posterior probability  $m_k$  that indicates whether an effect exists in the study  $k$ .

$$m_i = P(E_i = 1|Y) = \frac{P(Y|E_i = 1)P(E_i = 1)}{P(Y|E_i = 0)P(E_i = 0) + P(Y|E_i = 1)P(E_i = 1)}$$

$$= \frac{\sum_{e \in U_i} P(Y|E = e)P(E = e)}{\sum_{e \in U} P(Y|E = e)P(E = e)}$$

where  $U_i$  is a subset of  $U$  whose elements'  $l$ th value is 1. The association statistic of the BE model is then calculated by using this pre-estimated posterior probability as a weight while aggregating individual study effects as below:

$$S_{BE} = \frac{\sum m_k \sqrt{w_k} Z_k}{\sqrt{\sum m_k^2 w_k}} \text{ where } w_k = N_k.$$

**CPASSOC (Cross-phenotype Association):** Similar to the ASSET and BE, CPASSOC assumes that effects may exist only within a subset of study traits.[4] However, unlike those two methods, CPASSOC identifies the subset of studies with effects by sequentially adding a trait by an incremental order of their association significance. Among the sequentially examined subsets, the one with the highest meta statistics is selected. The proposed set-based meta statistics is as follows:

$$S(\tau) = \frac{e^\tau (R(\tau)W(\tau))^{-1} U(\tau) \left( e^\tau (R(\tau)W(\tau))^{-1} U(\tau) \right)^T}{e^\tau W(\tau)^{-1} R(\tau)^{-1} W(\tau)^{-1} e}$$

$$S_{Het} = \max_{\tau > 0} S(\tau)$$

where  $R(\tau)$  is a submatrix of  $R$  representing the correlation matrix between study traits,  $U(\tau)$  is the sub-vector of the Wald test statistic  $U$  satisfying  $U_{jk} > \tau$ , and  $W(\tau)$  is the diagonal submatrix of  $W$ , corresponding to  $T(\tau)$ .

**REMA (Random-Effects Meta-analysis):** The random-effect meta-analysis model assumes that the mean effect of a variant could vary across different studies, and therefore the variance of the mean distribution represents the variance within studies as well as between-study heterogeneity.[5] The combined effect in the random effects meta-analysis thus represents the mean of the distribution of true effects. Using the method proposed by DerSimonian and Laird,[6] we calculate the Z-score of REMA as below:

$$Z_{\text{REMA}} = \frac{\sum_{k=1}^K w'_k X_k}{\sqrt{\sum_{k=1}^K w'_k}} \text{ where}$$

$$w'_k = \frac{1}{\frac{1}{w_k} + \tau^2}, \quad w_k = \frac{1}{se_k^2}, \quad \tau^2 = \frac{Q - (k-1)}{\sum w_k - \left(\frac{\sum w_k}{\sum w_k}\right)^2}, \text{ and } Q = \sum w_k (X_k - \bar{X})^2.$$

Here Q is Cochran's Q statistic representing the total variance, while  $k-1$  represents the expected variance when all studies have the same true effect.

**HE-REMA (Han and Eskin's Random Effects Model):** The HE-REMA is a newly developed random-effects meta-analysis method that aims to improve the discovery power for heterogeneous effects.[7] Unlike classical REMA, Han and Eskin's model assumes no heterogeneity under the null hypothesis, thus increasing the detection power in the presence of between-study heterogeneity. We used the HE-REMA model implemented in the METASOFT package. The statistic of HE-REMA is defined as:

$S_{HE-REMA} = S_{FE} + S_{Het}$  where

$$S_{FE} = \left\{ \sum \frac{X_i^2}{V_i} - \sum \frac{(X_i - \hat{\mu})^2}{V_i} \right\},$$

$$S_{Het} = \left\{ \sum \log \left( \frac{V_i}{V_i + \hat{\tau}^2} + \sum \frac{(X_i - \hat{\mu})^2}{V_i} - \sum \frac{(X_i - \bar{\mu})^2}{V_i + \hat{\tau}^2} \right) \right\},$$

and  $\bar{\mu}$  is the maximum likelihood estimate of the average effect size under the restriction  $\tau^2 = 0$ .

**Fisher (Fisher's Method):** Another major category of classic meta-analysis approaches combines evidence of association by aggregating  $p$ -values, rather than effect sizes, across study traits. Here we test Fisher's method, which is asymptotically optimal and efficient when the combined  $p$ -values are independent.[8]

$$X^2 = -2 \sum_{k=1}^K \log(p_k).$$

Under the null hypothesis and independence of study traits,  $p$ -values follow a uniform distribution and the corresponding  $X^2$  statistic approximates a chi-squared distribution with  $2K$  df.

**WICS (Weighted Inverse Chi-Square):** The WICS method calculates the meta-analysis statistic by summing the weighted chi-squares of individual studies. Here we used the WICS method implemented in the R package by Zaykin and Kozbur,[9] which

uses the squared root of the study sample size as a weight. Given study  $p$ -values, the chi-square statistic of individual studies are obtained from the inverse transformation of the chi-square distribution with 1 df.

$$\chi_i^2 = \Psi^{-1}(1 - p_i)$$

where  $\Psi^{-1}$  denotes the inverse chi-square distribution with 1 df. The weights for the underlying multivariate normal scores are given by

$$w_i = \sqrt{N_i(\mathbf{R}^{-1})_{ii}}.$$

For  $k$  studies, the weighted sum of independent inverse chi-squares is given by

$$S_{WICS} = \sum_{i=1}^k w_i^2 \chi_i^2.$$

**CPMA (Cross-Phenotype Meta-analysis):** The CPMA method examines whether the distribution of observed association  $p$ -values across multiple traits deviates from the distribution of random  $p$ -values expected under the null hypothesis.[10] If all study traits are independent and not associated with a genetic variant, the association  $p$ -values are expected to be uniformly distributed and  $-\log(p)$  is exponentially decaying with a decay rate  $\lambda = 1$ . To measure the discrepancy, the CPMA test statistic  $S_{CPMA}$  is defined with a likelihood ratio test as:

$$S_{CPMA} = -2 \times \frac{P(Data|\lambda = 1)}{P(Data|\lambda = \hat{\lambda})}$$

The CPMA  $p$ -value is obtained by a 1 degree of freedom chi-square test.

## Reference

1. Greenland S (1987) Quantitative methods in the review of epidemiologic literature. *Epidemiol Rev* 9: 1-30.
2. Bhattacharjee S, Rajaraman P, Jacobs KB, Wheeler WA, Melin BS, et al. (2012) A subset-based approach improves power and interpretation for the combined analysis of genetic association studies of heterogeneous traits. *Am J Hum Genet* 90: 821-835.
3. Han B, Eskin E (2012) Interpreting meta-analyses of genome-wide association studies. *PLoS Genet* 8: e1002555.
4. Zhu X, Feng T, Tayo BO, Liang J, Young JH, et al. (2015) Meta-analysis of correlated traits via summary statistics from GWASs with an application in hypertension. *Am J Hum Genet* 96: 21-36.
5. Cochran WG (1954) The Combination of Estimates from Different Experiments. *Biometrics* 10: 101-129.
6. DerSimonian R, Laird N (1986) Meta-analysis in clinical trials. *Control Clin Trials* 7: 177-188.
7. Han B, Eskin E (2011) Random-effects model aimed at discovering associations in meta-analysis of genome-wide association studies. *Am J Hum Genet* 88: 586-598.
8. Fisher RA (1925) *Statistical Methods for Research Workers*. Edinburgh: Oliver and Boyd.
9. Zaykin DV, Kozbur DO (2010) P-value based analysis for shared controls design in genome-wide association studies. *Genet Epidemiol* 34: 725-738.
10. Cotsapas C, Voight BF, Rossin E, Lage K, Neale BM, et al. (2011) Pervasive sharing of genetic effects in autoimmune disease. *PLoS Genet* 7: e1002254.
