# Supplementary material for: Statistical power and utility of meta-analysis methods for cross-phenotype genome-wide association studies
Source: PLoS One. 2018 Mar 1;13(3):e0193256. doi: 10.1371/journal.pone.0193256 (PMC5832233; doi:10.1371/journal.pone.0193256)

Figure S13 Power (Alpha=0.001 K=10, OR=1.2 50% Effects Opposite Direction)

### (A) Normal Distribution

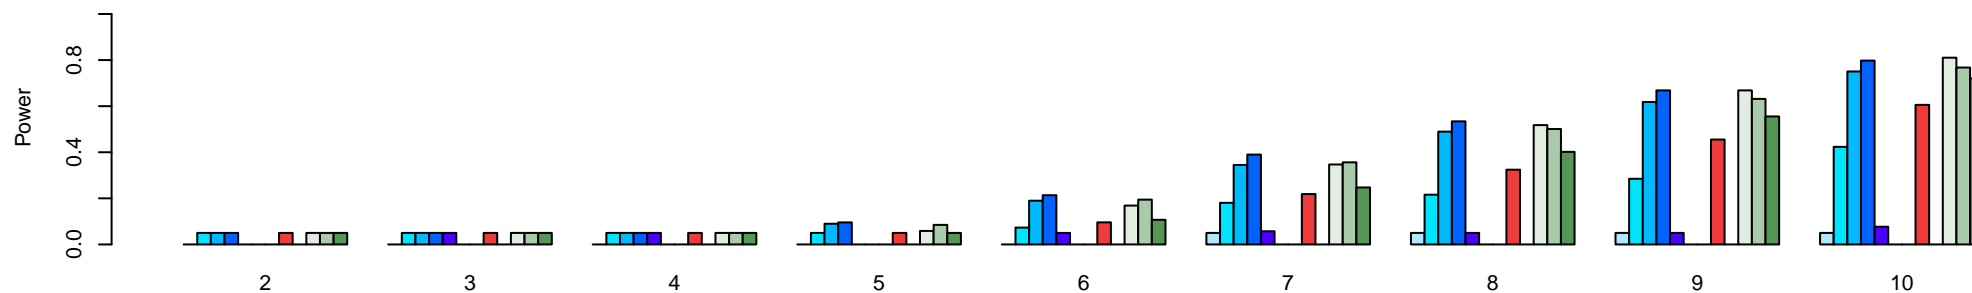

### (B) Bimodal Normal Distribution

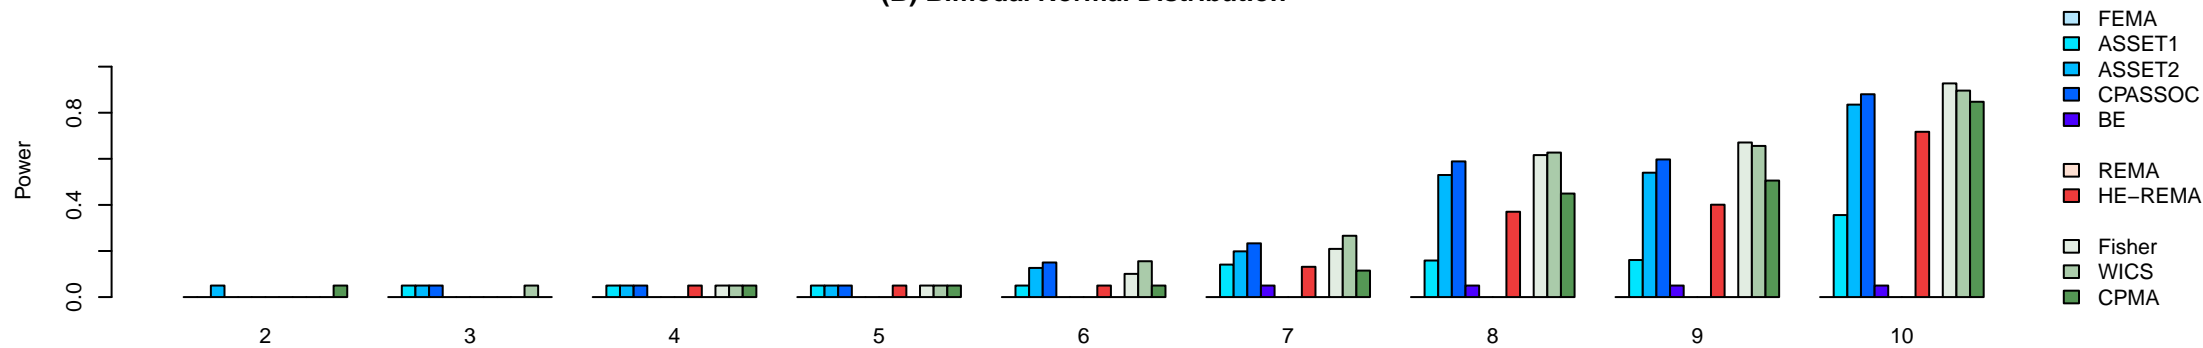

### (C) Uniform Distribution

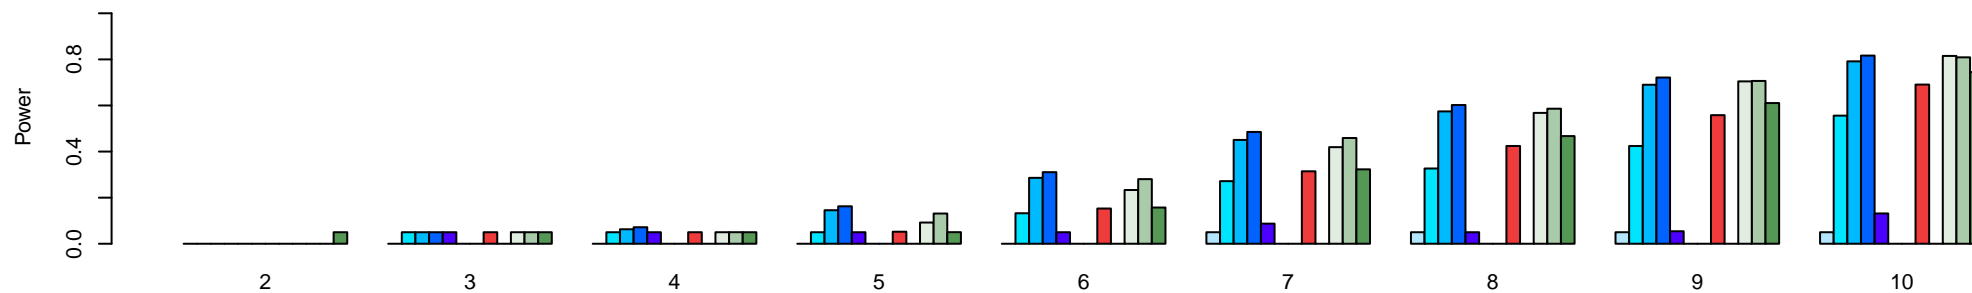

Supplement: S13 Fig — (PDF) [file pone.0193256.s013.pdf]
